# Supplementary material for: Genome landscape and genetic architecture of recombination in domestic goats (Capra hircus)
Source: Springer Nature journal article supplement (doi:10.1186/s12711-025-01001-0), 2025-10-16

# Chromosome-specific recombination maps

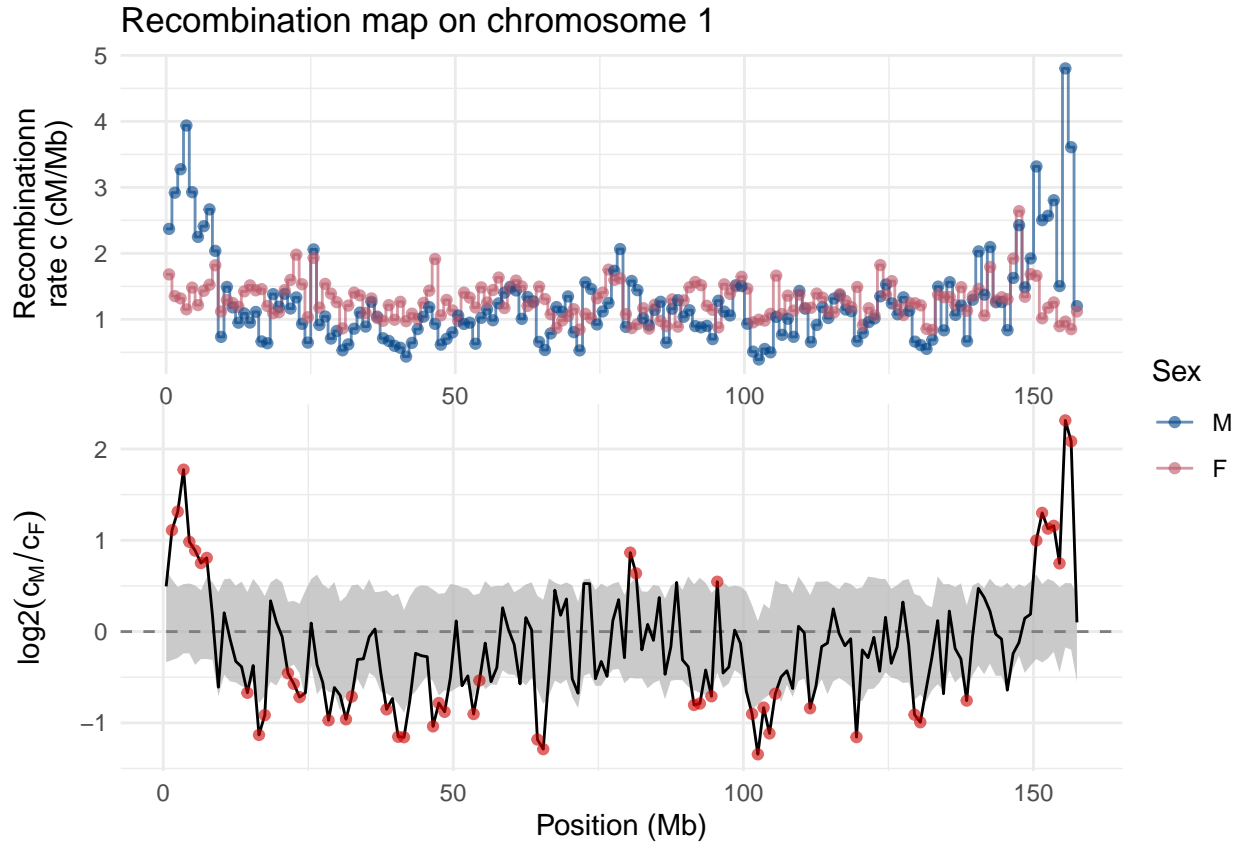

### Recombination map on chromosome 2

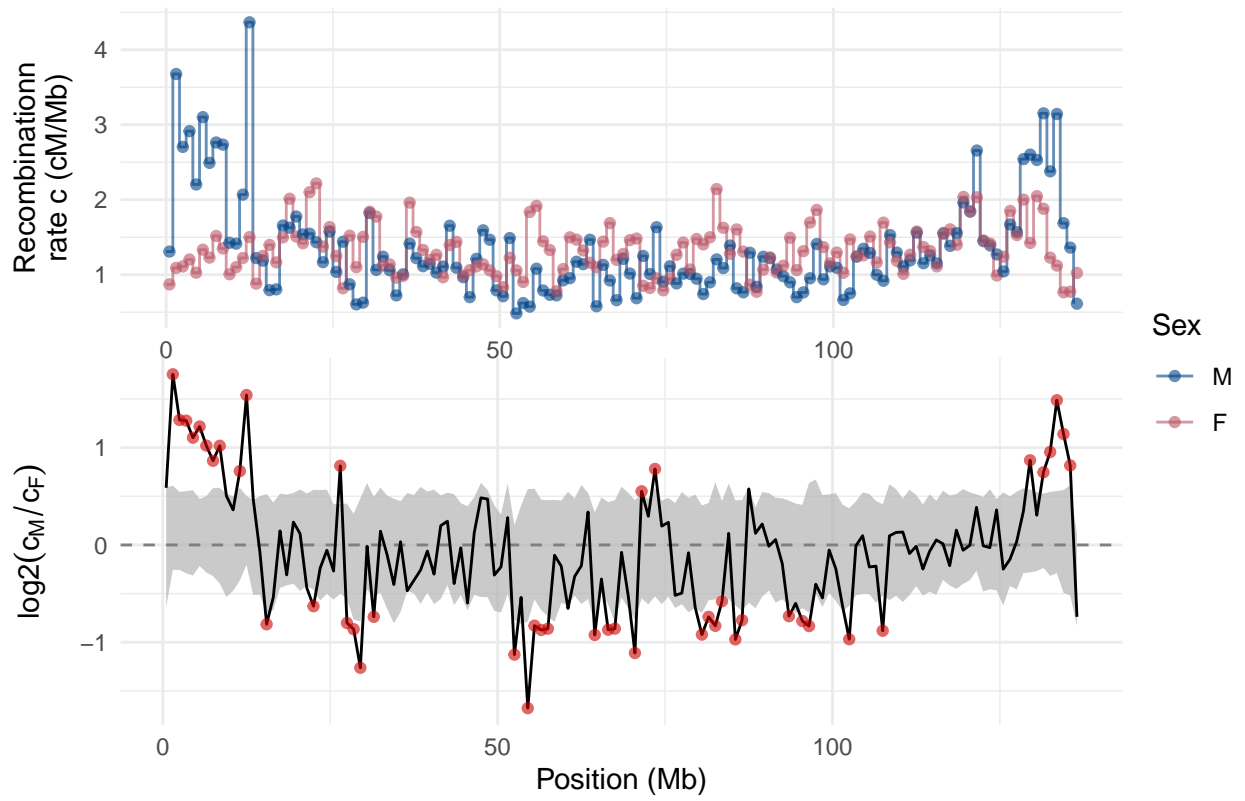

### Recombination map on chromosome 3

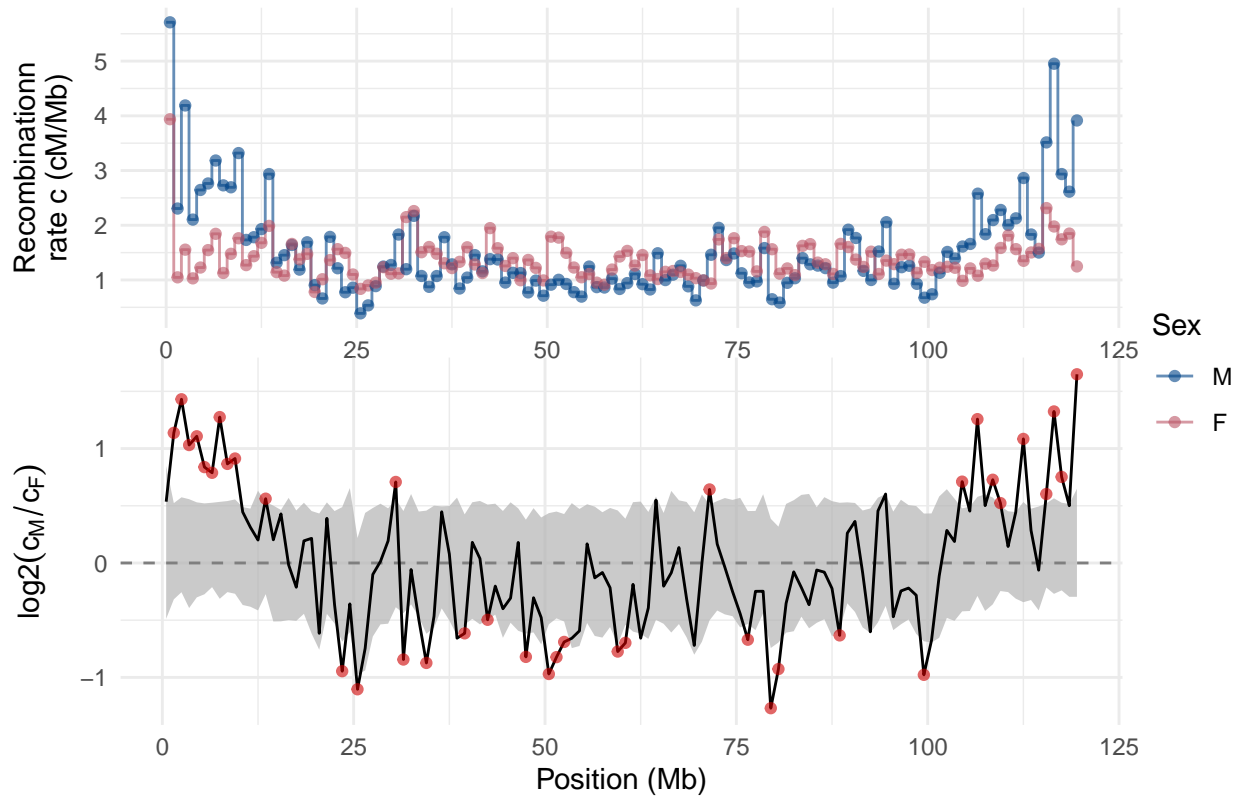

# Recombination map on chromosome 4

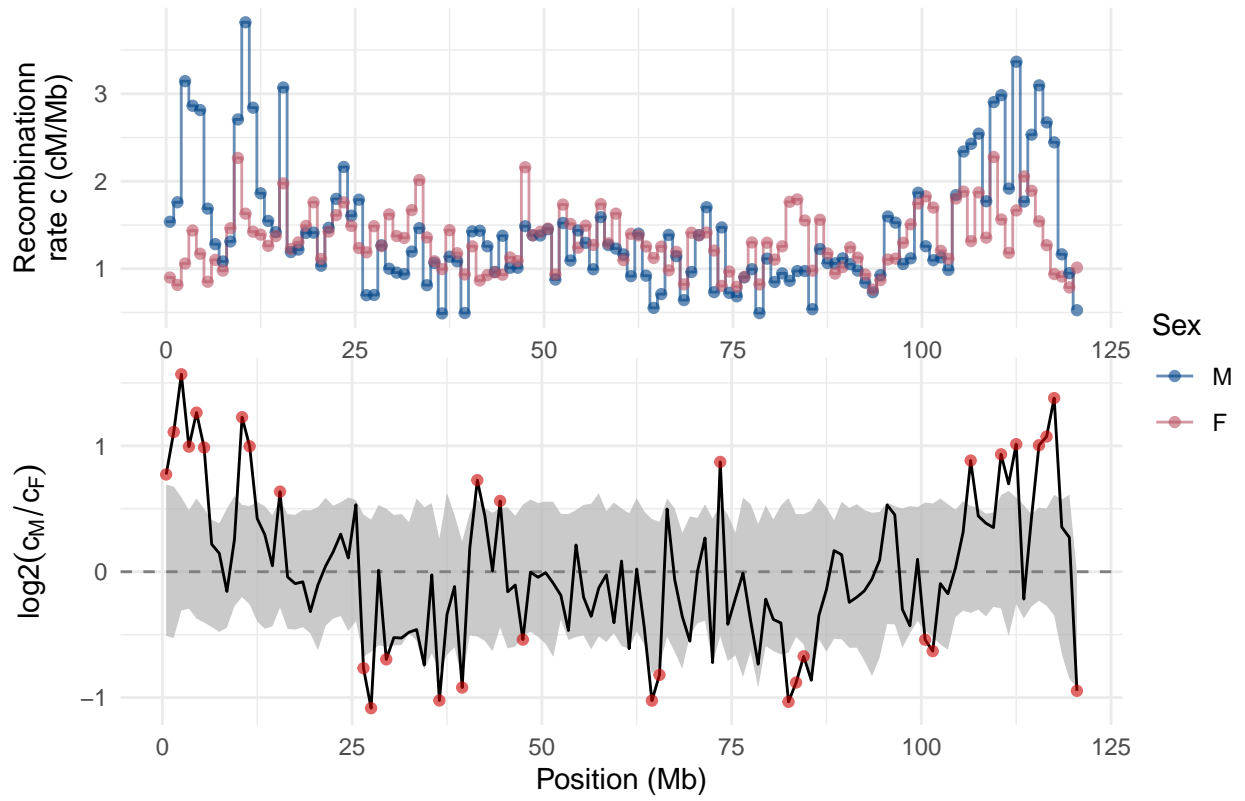

### Recombination map on chromosome 5

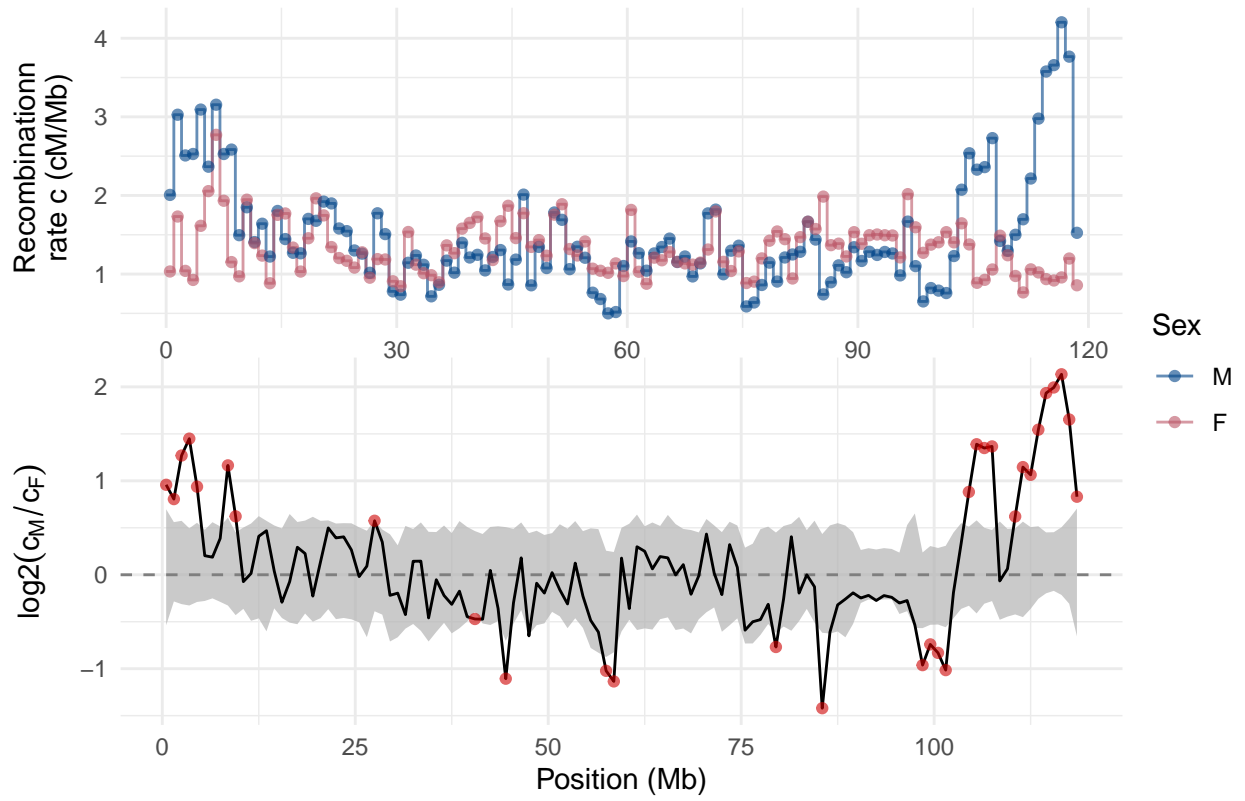

Recombination map on chromosome 6

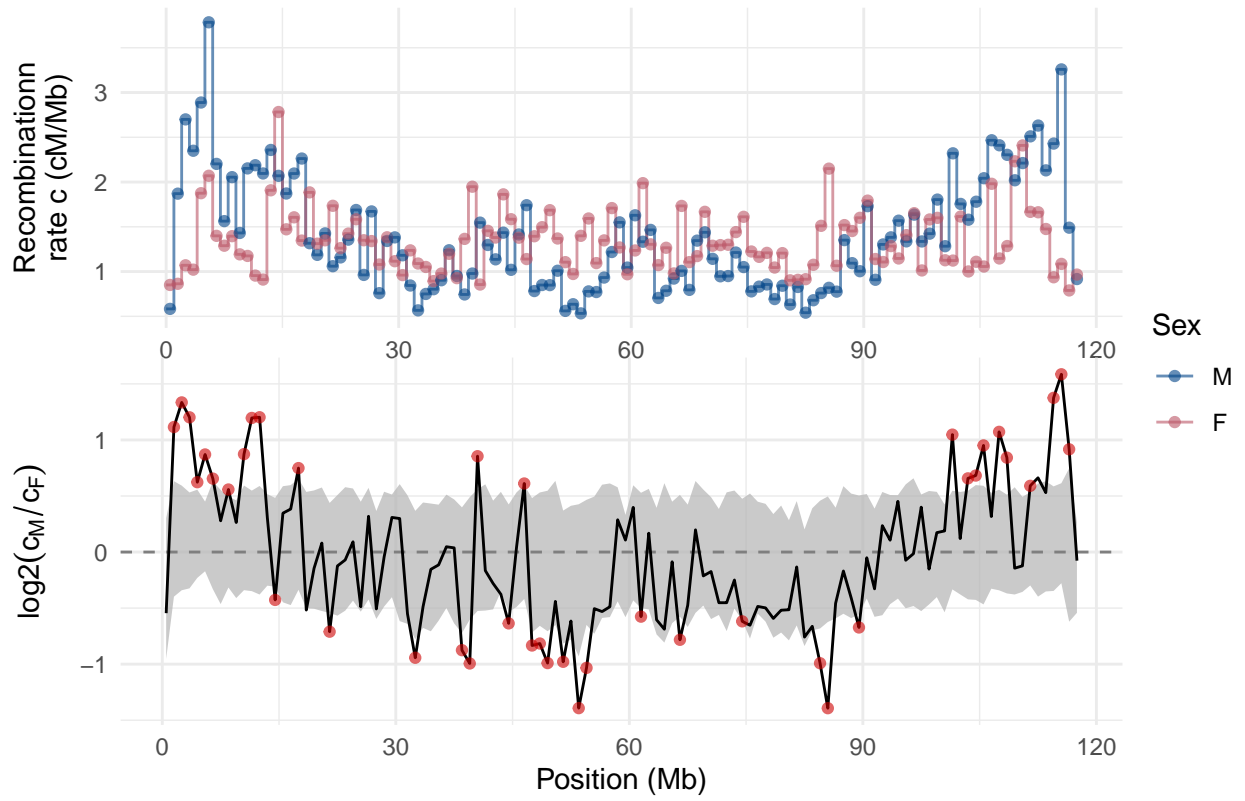

### Recombination map on chromosome 7

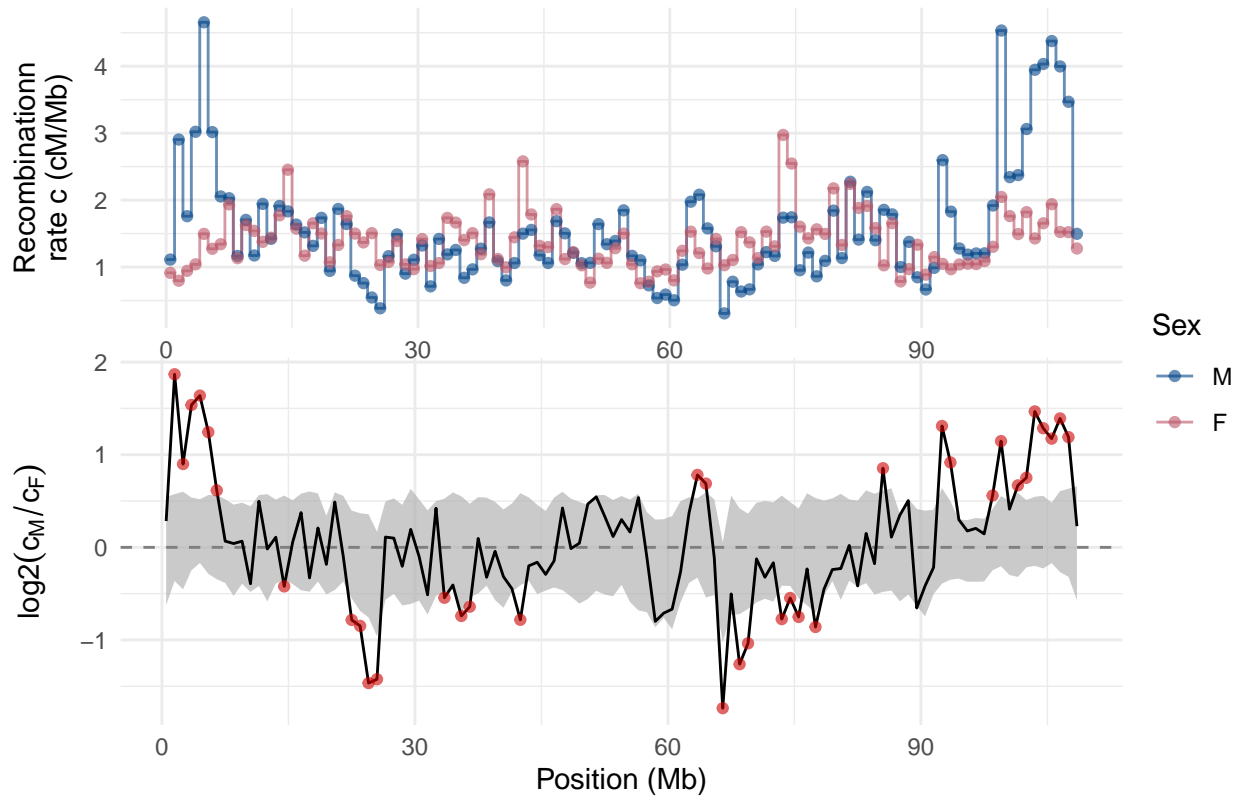

# Recombination map on chromosome 8

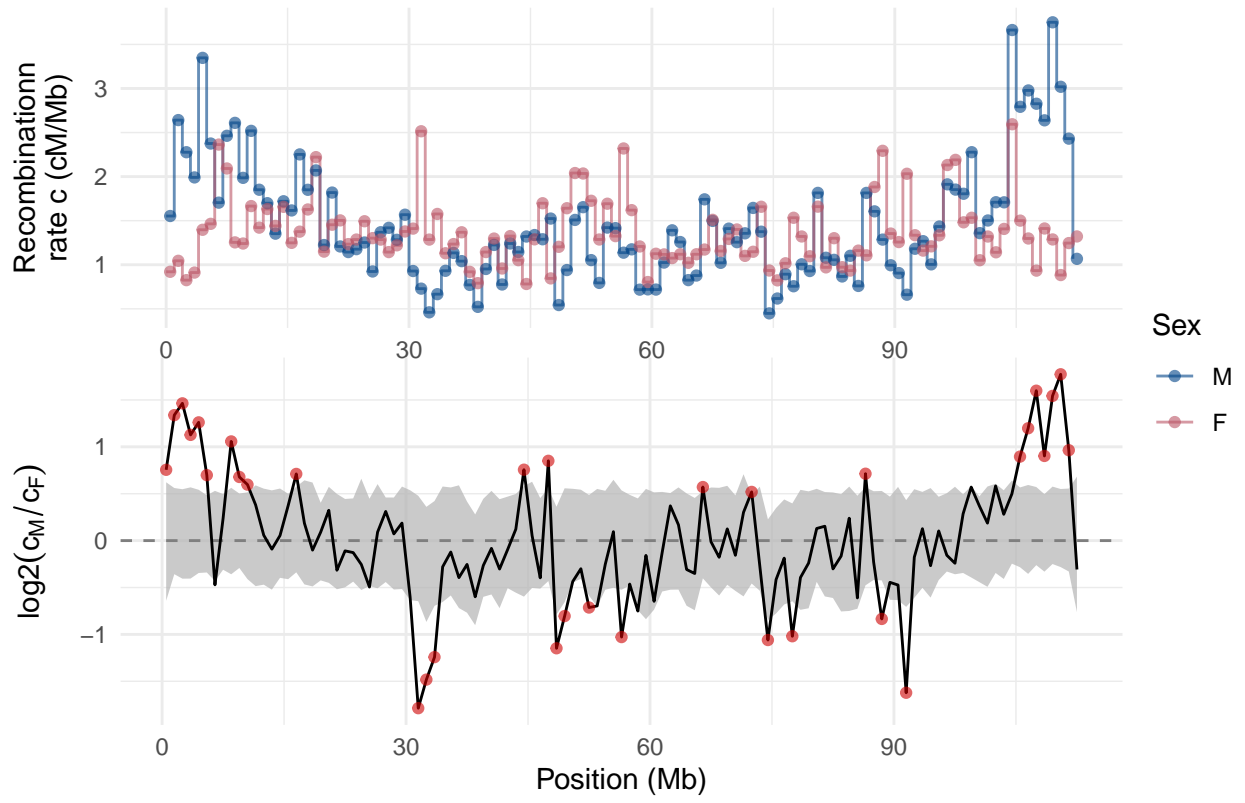

# Recombination map on chromosome 9

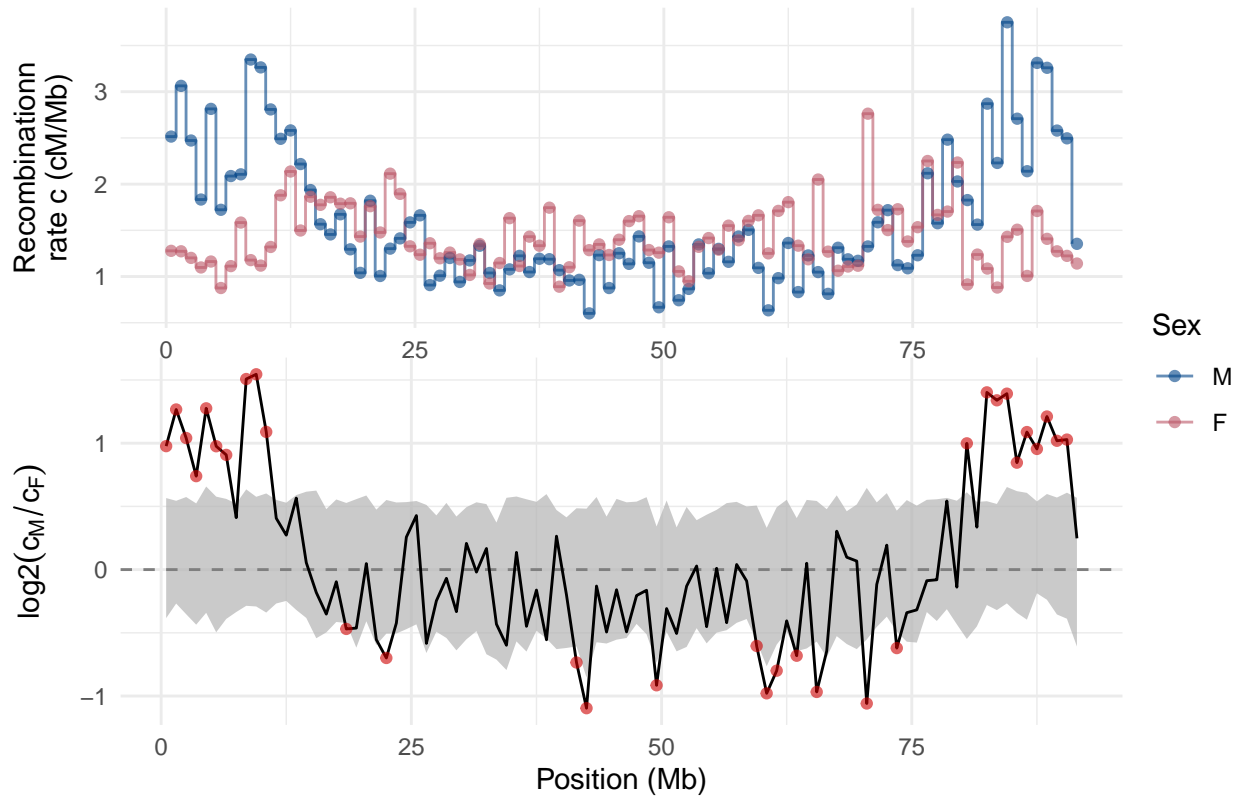

Recombination map on chromosome 10

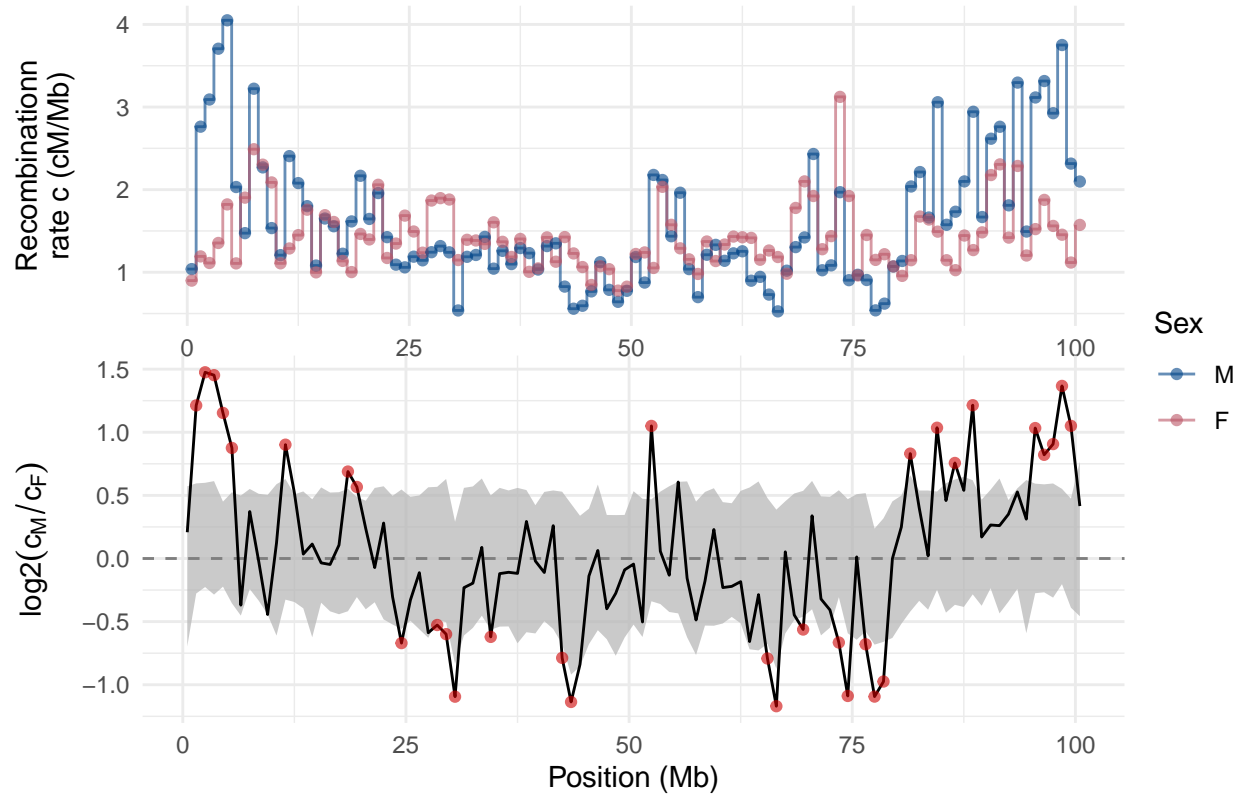

### Recombination map on chromosome 11

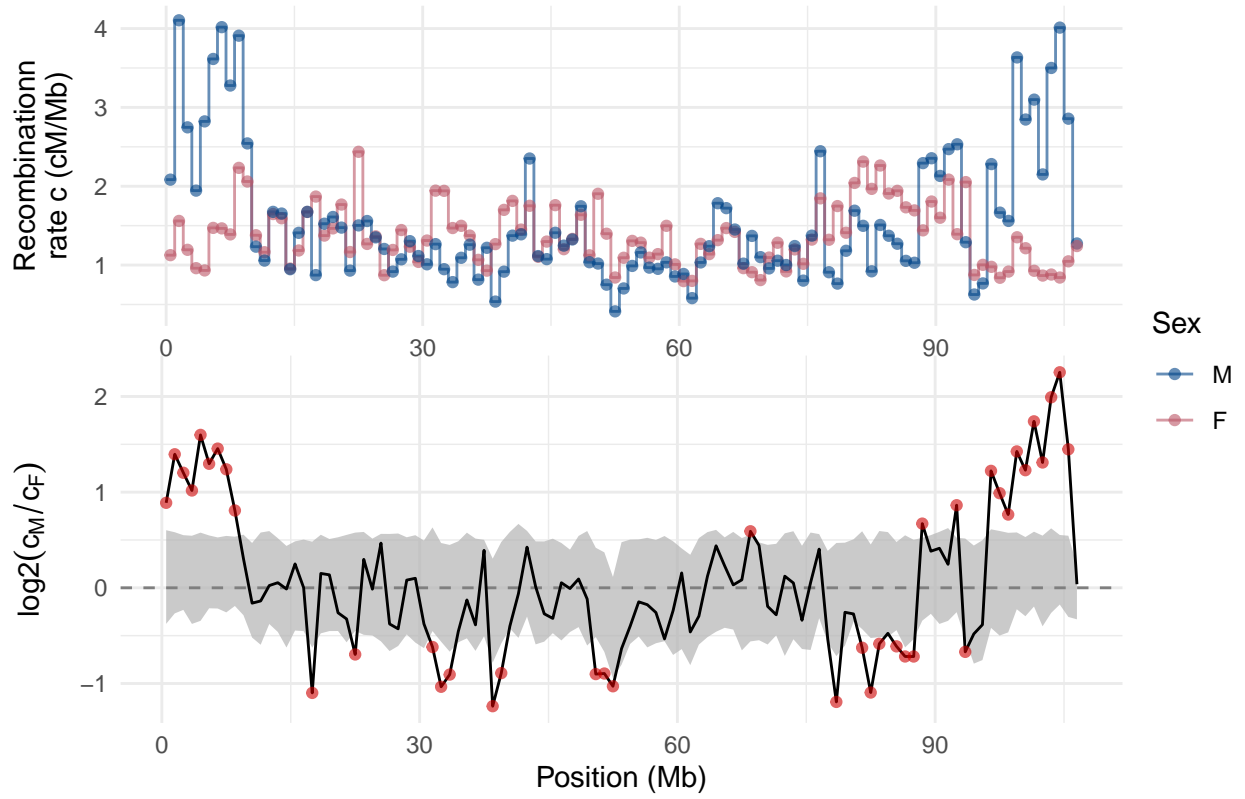

### Recombination map on chromosome 12

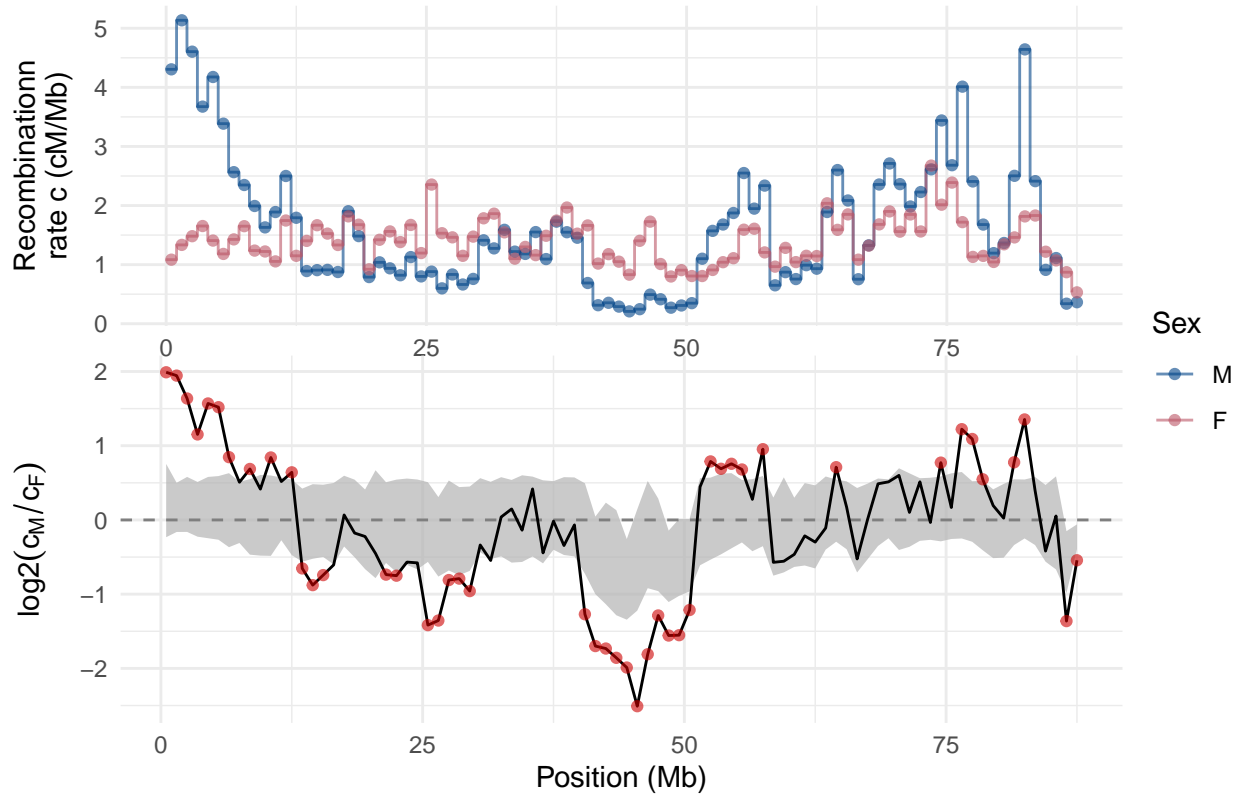

Recombination map on chromosome 13

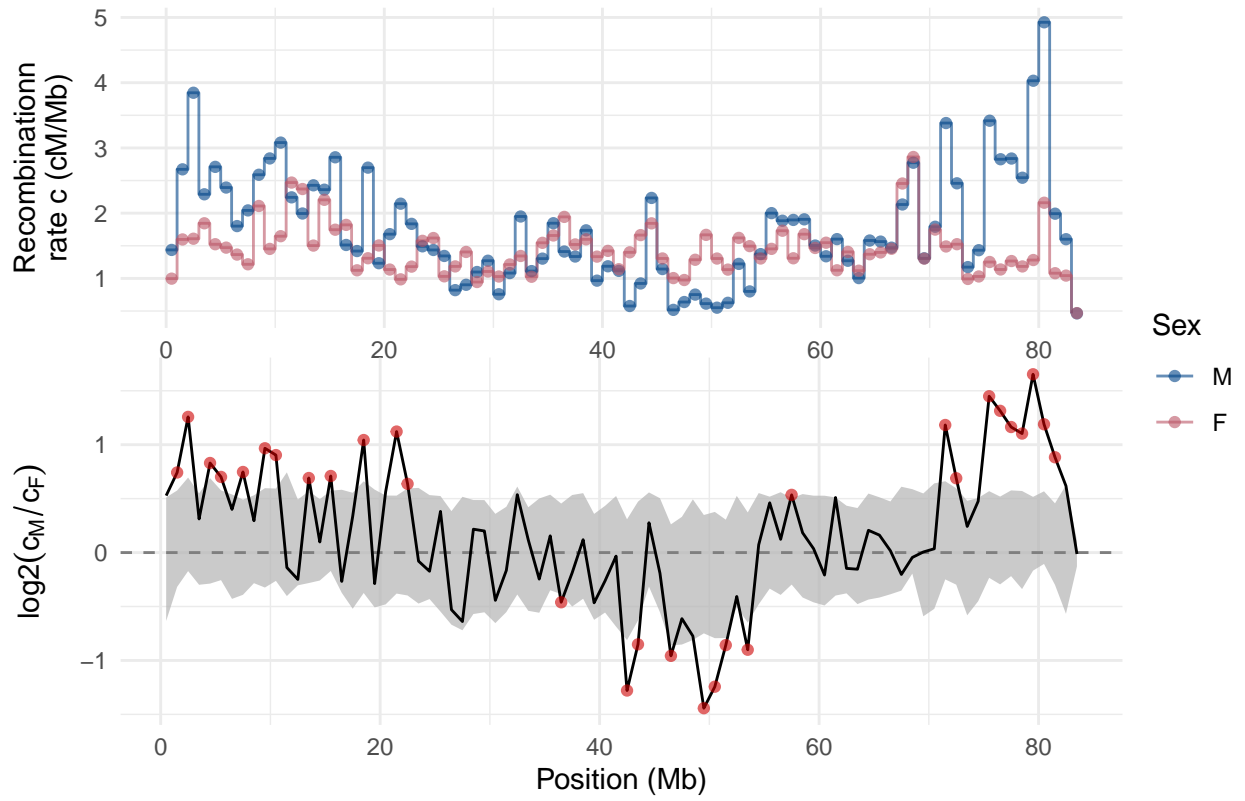

### Recombination map on chromosome 14

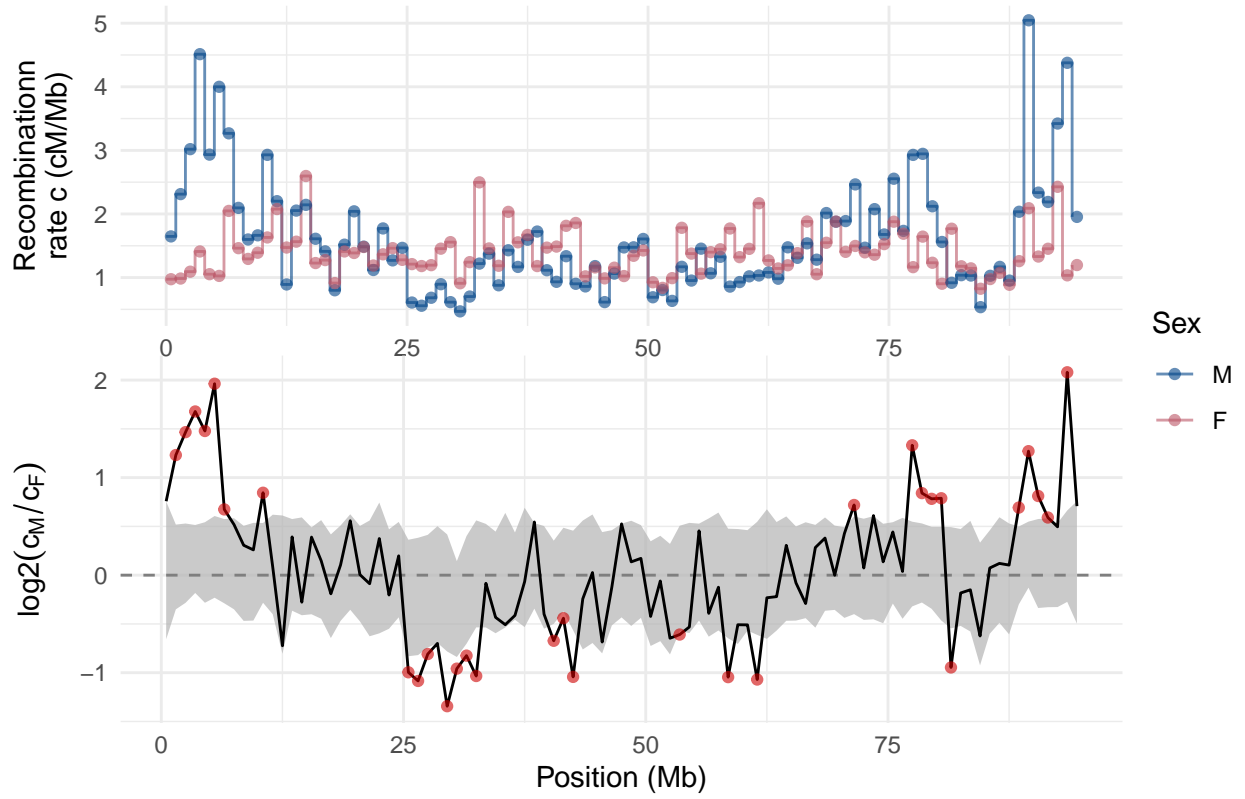

### Recombination map on chromosome 15

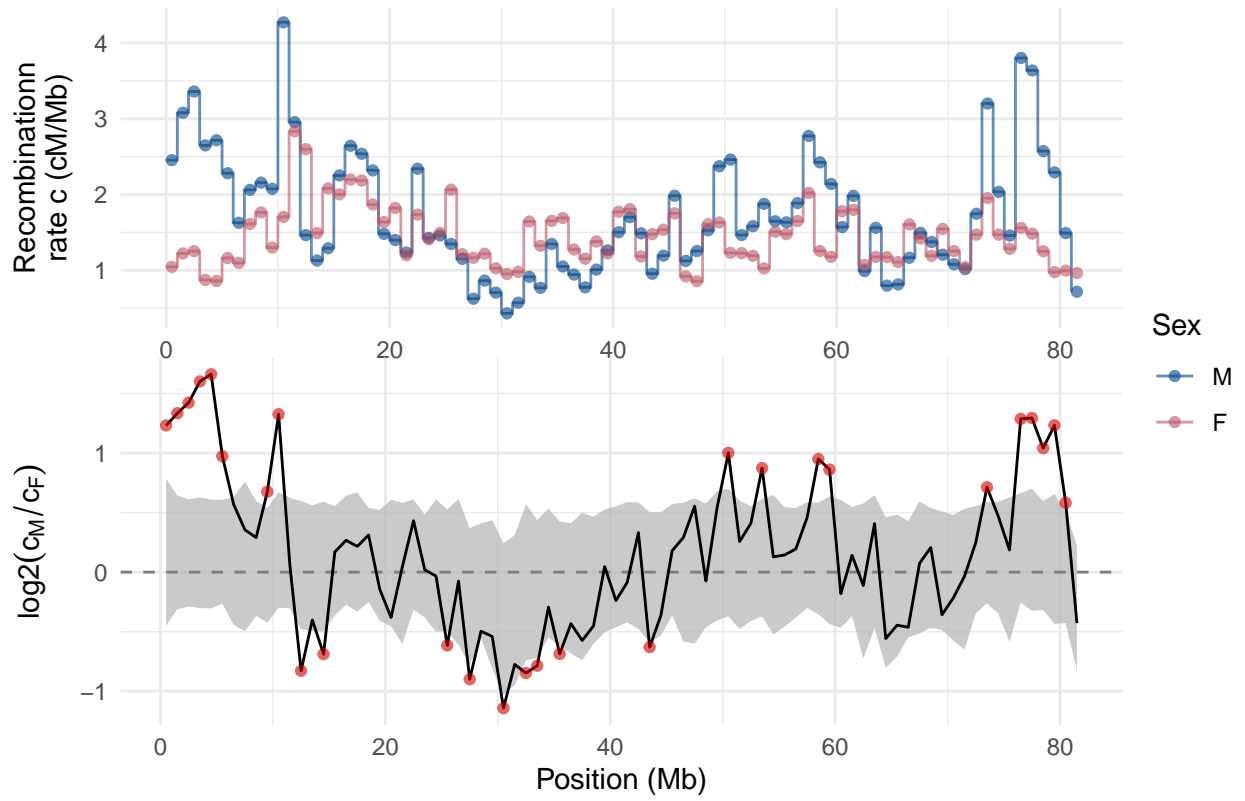

Recombination map on chromosome 16

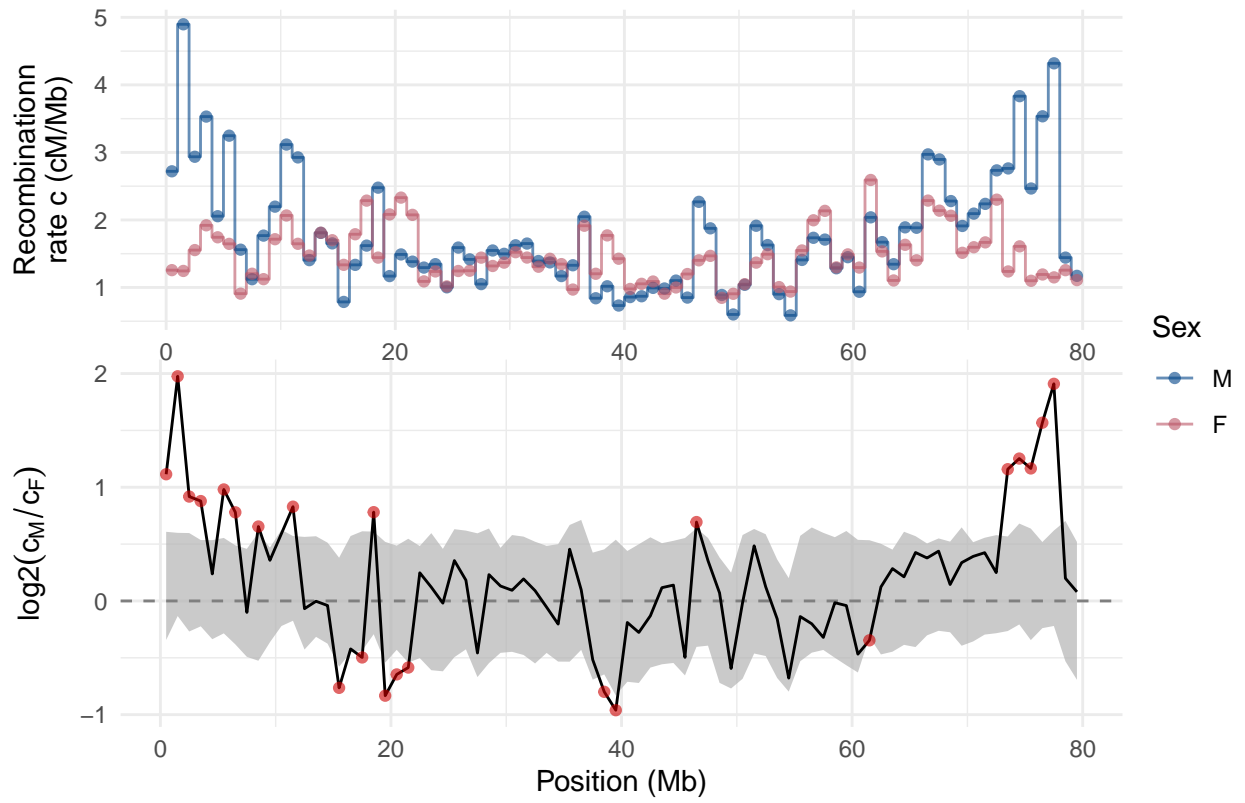

### Recombination map on chromosome 17

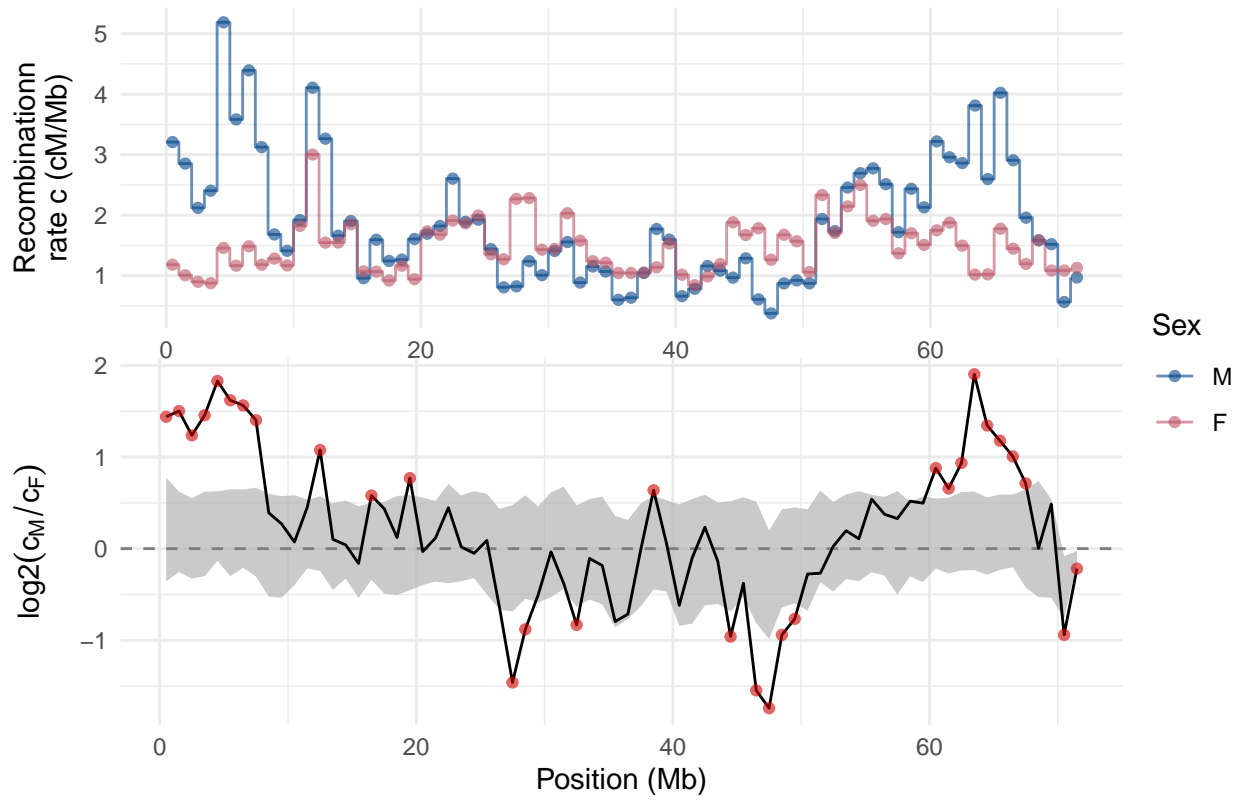

# Recombination map on chromosome 18

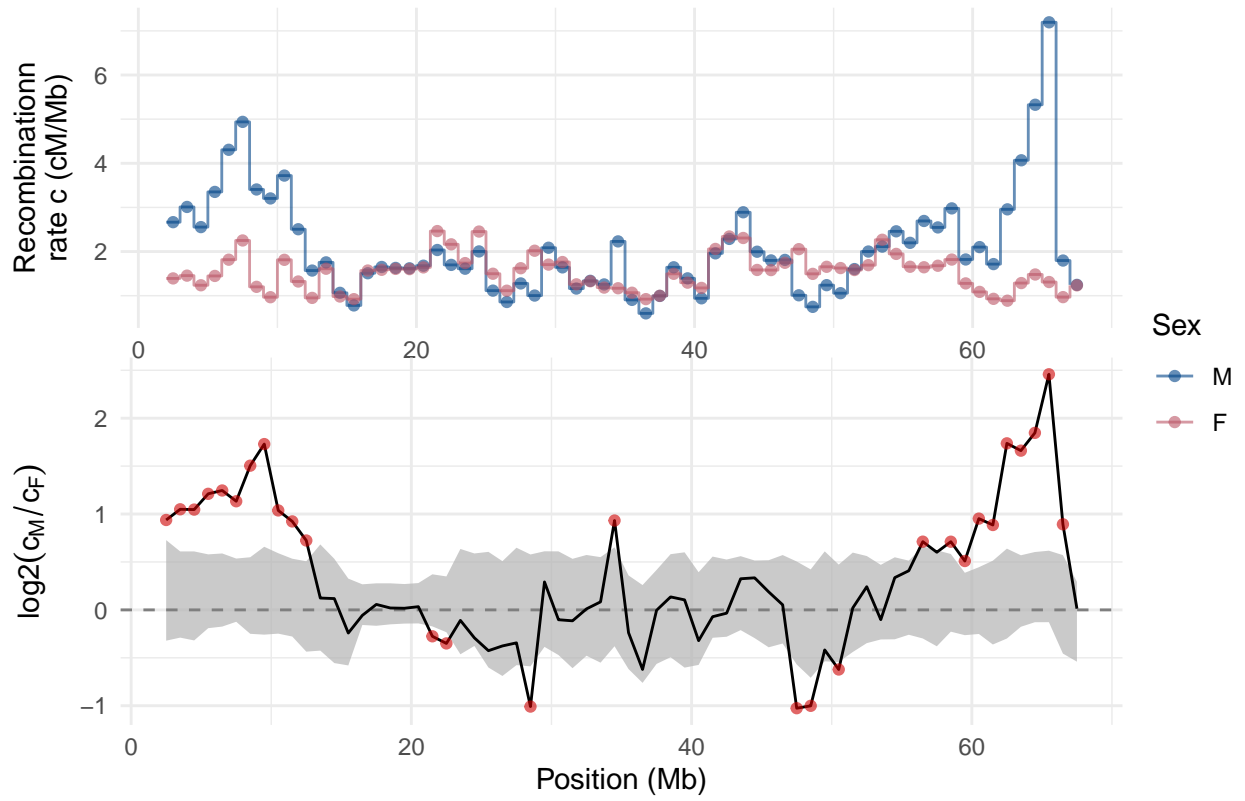

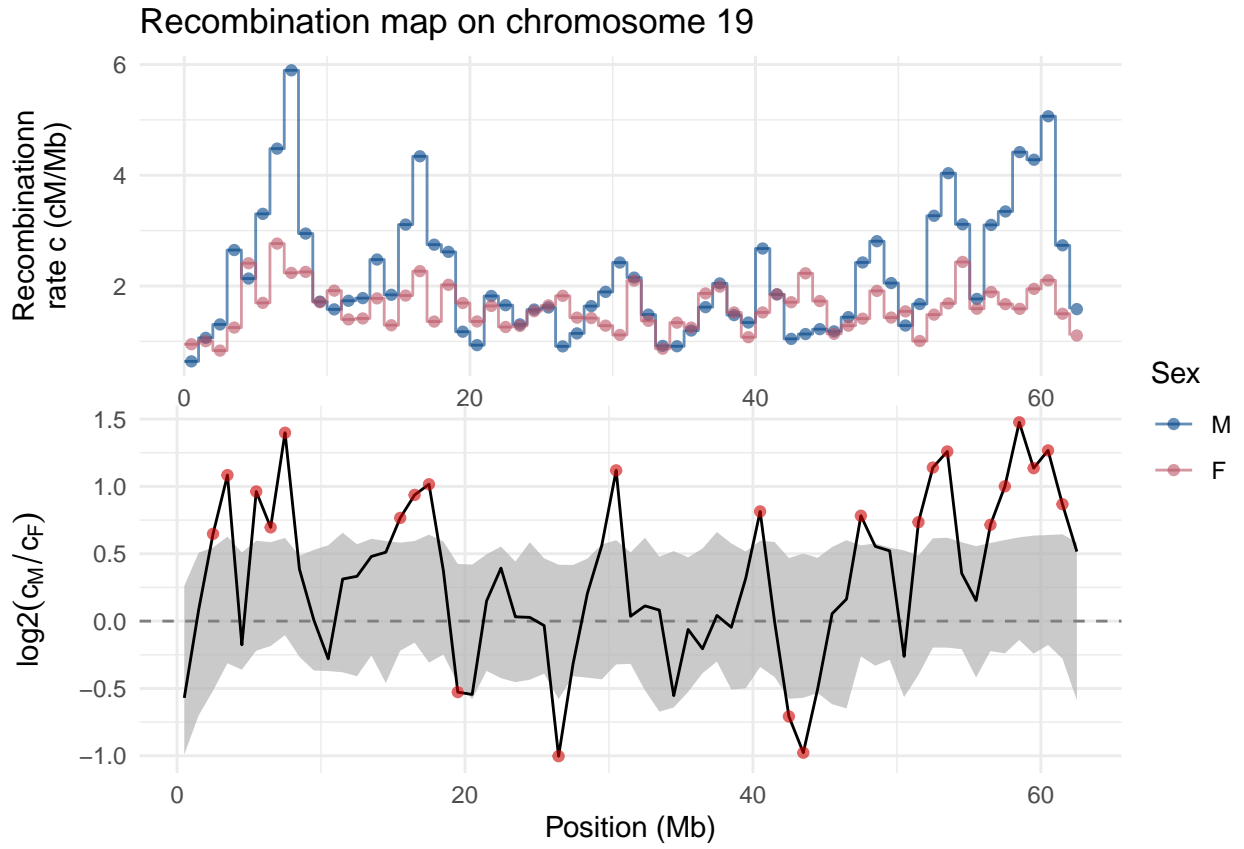

### Recombination map on chromosome 20

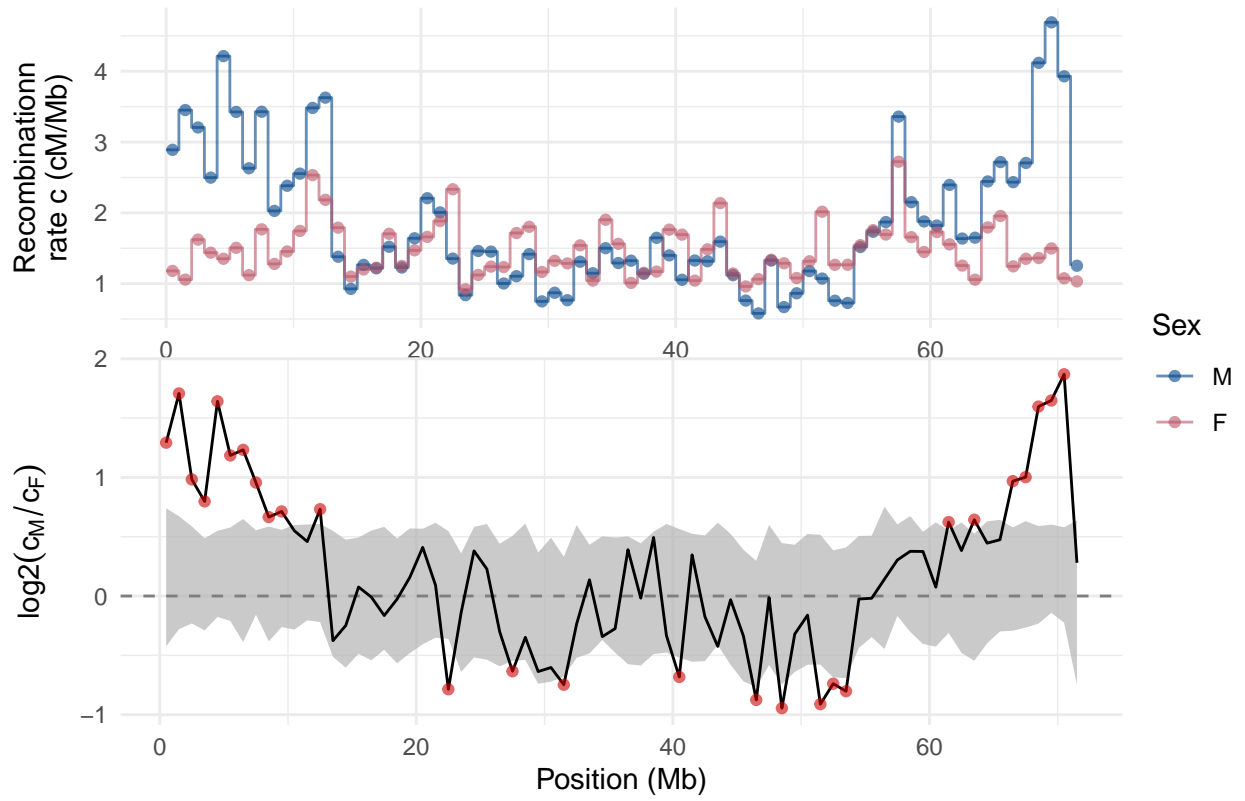

# Recombination map on chromosome 21

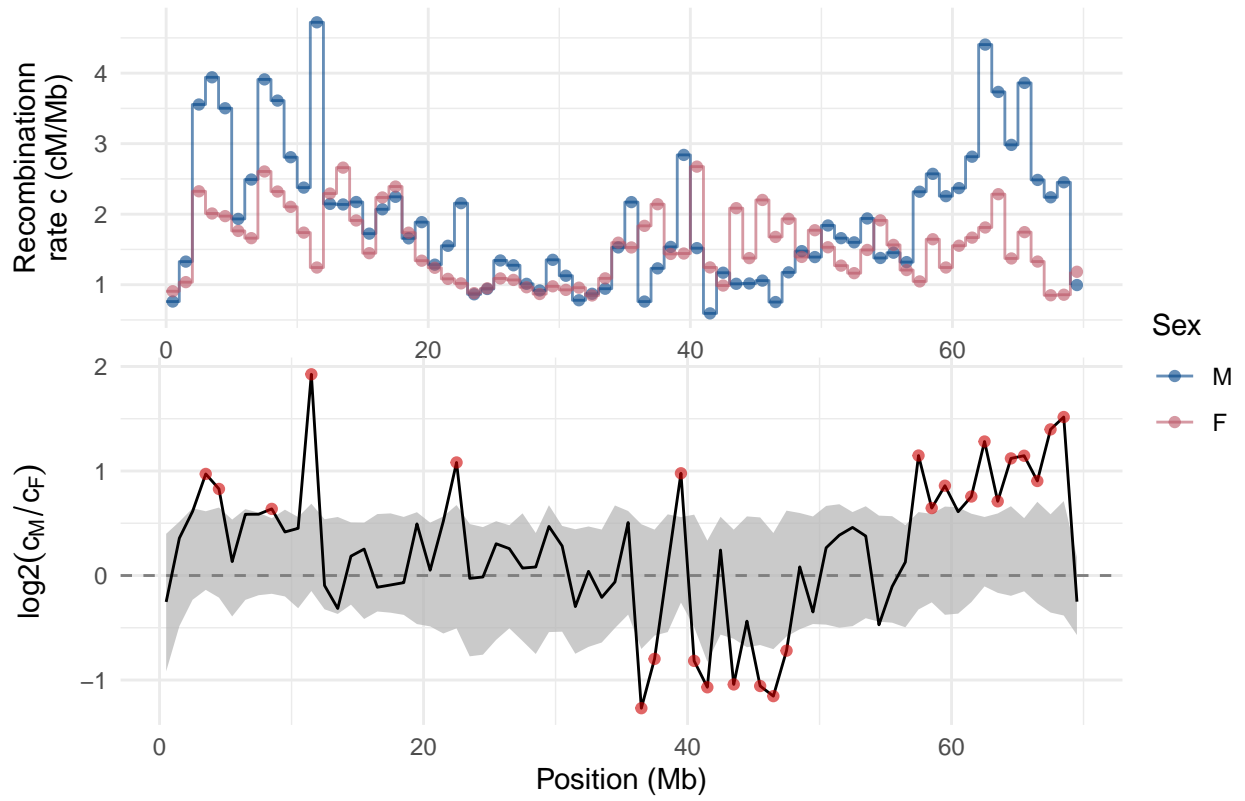

# Recombination map on chromosome 22

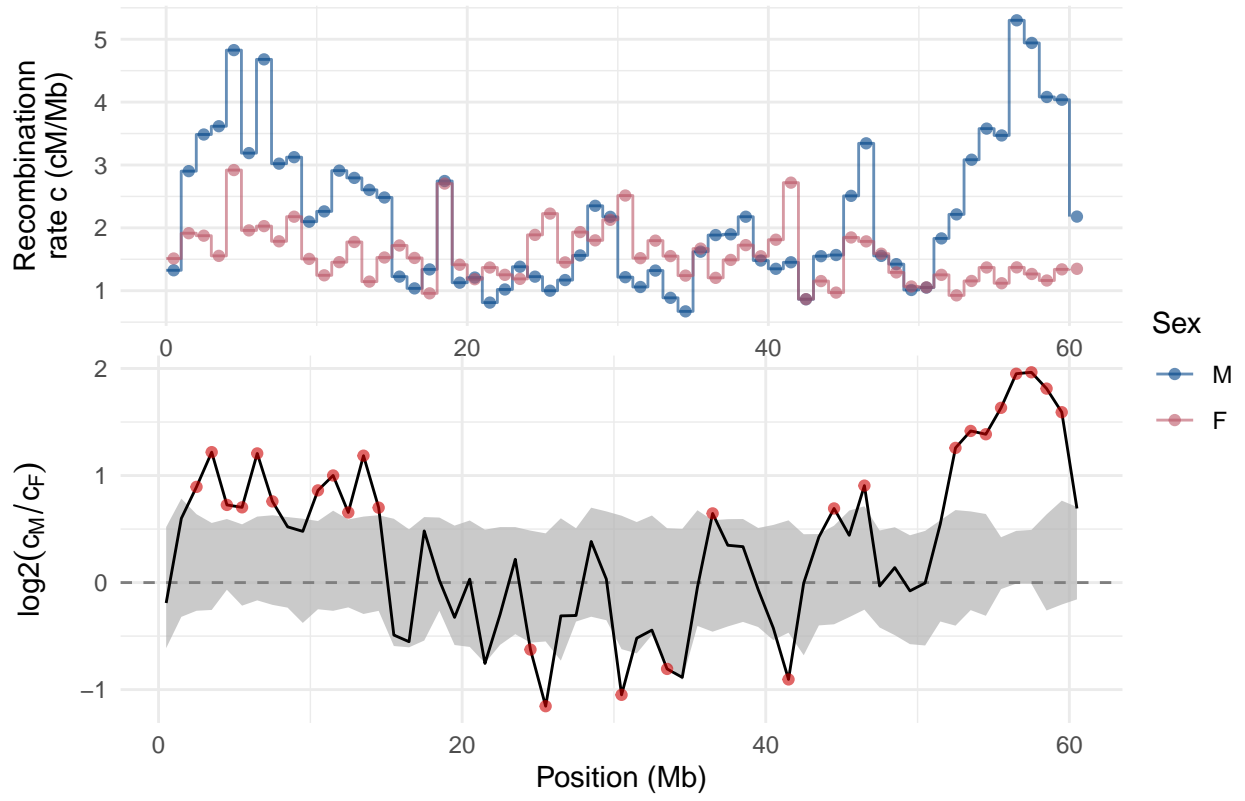

Recombination map on chromosome 23

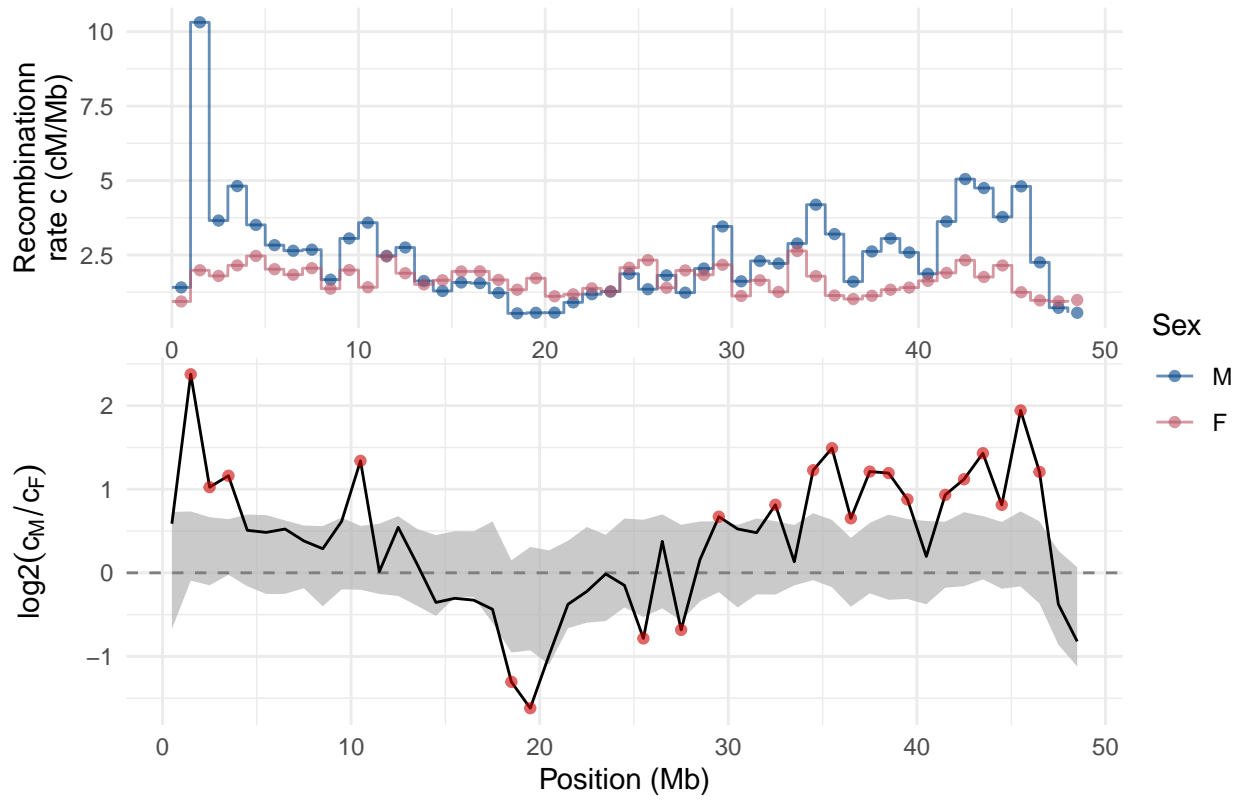

Recombination map on chromosome 24

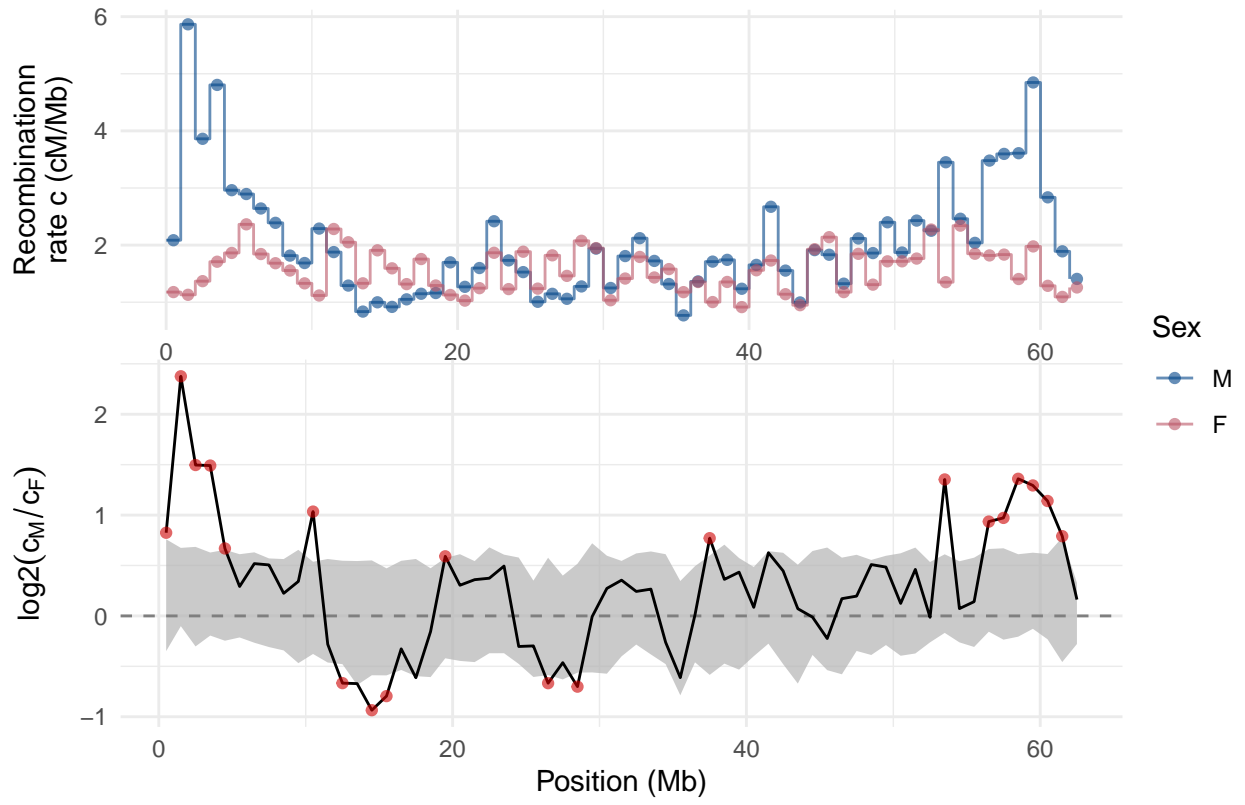

Recombination map on chromosome 25

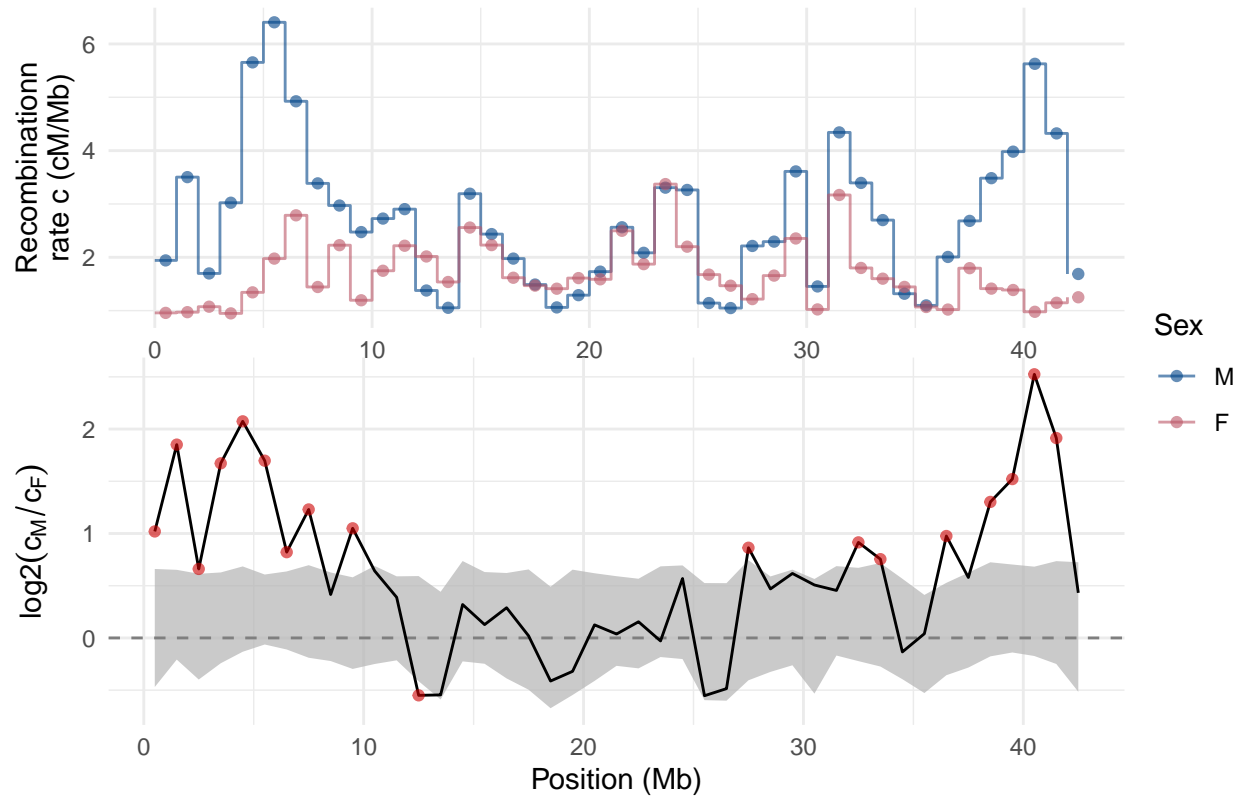

# Recombination map on chromosome 26

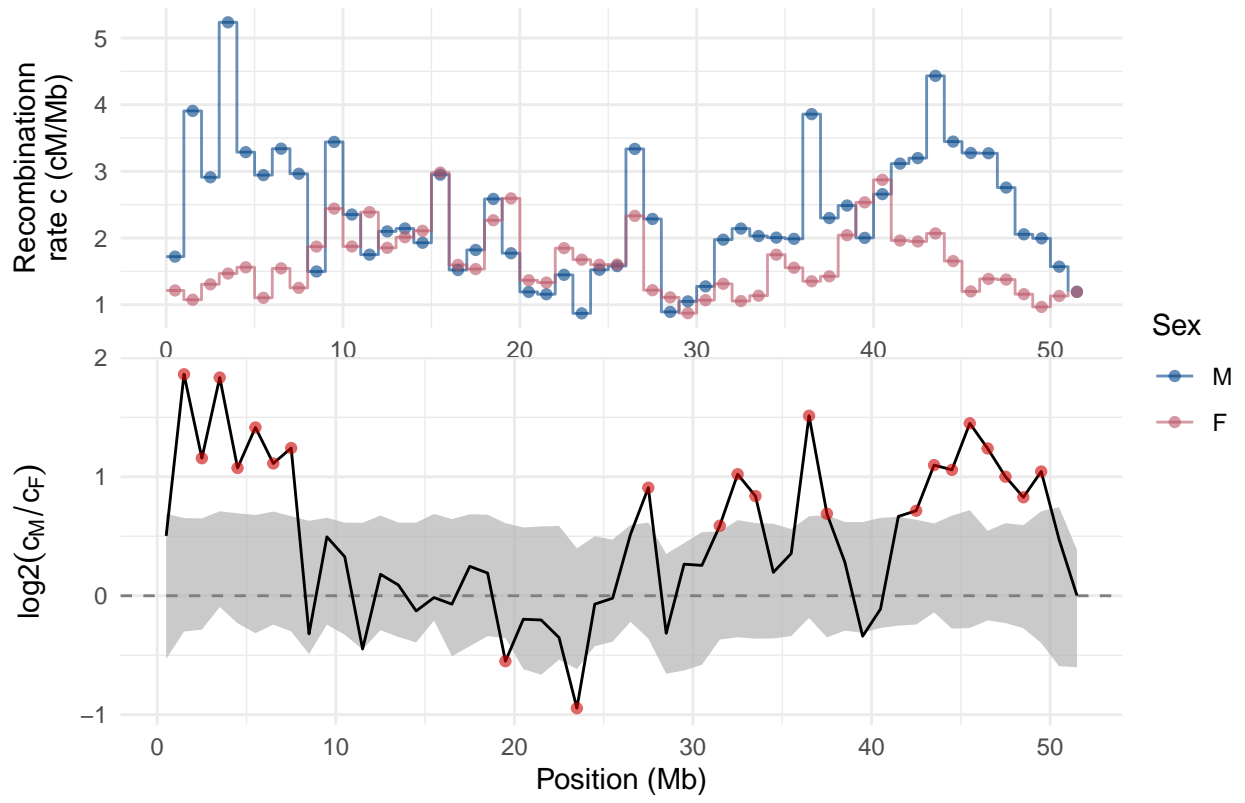

# Recombination map on chromosome 27

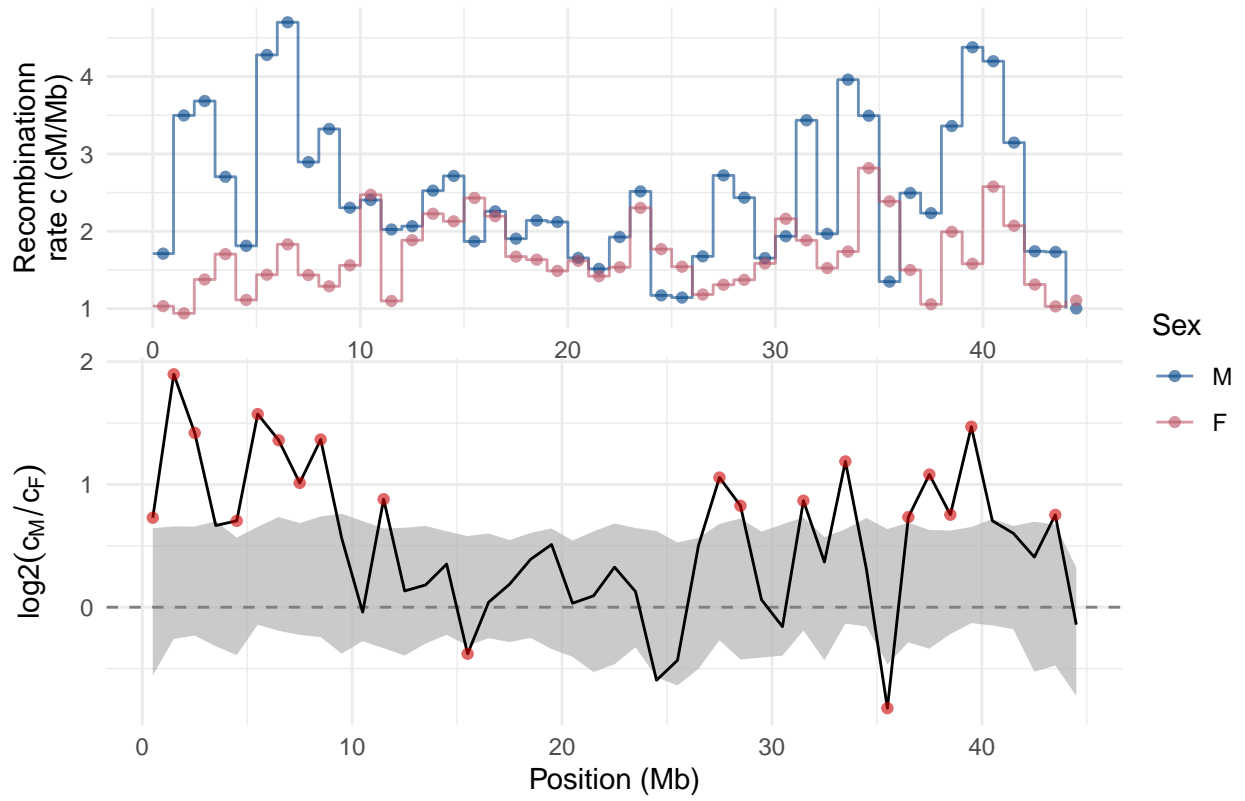

Recombination map on chromosome 28

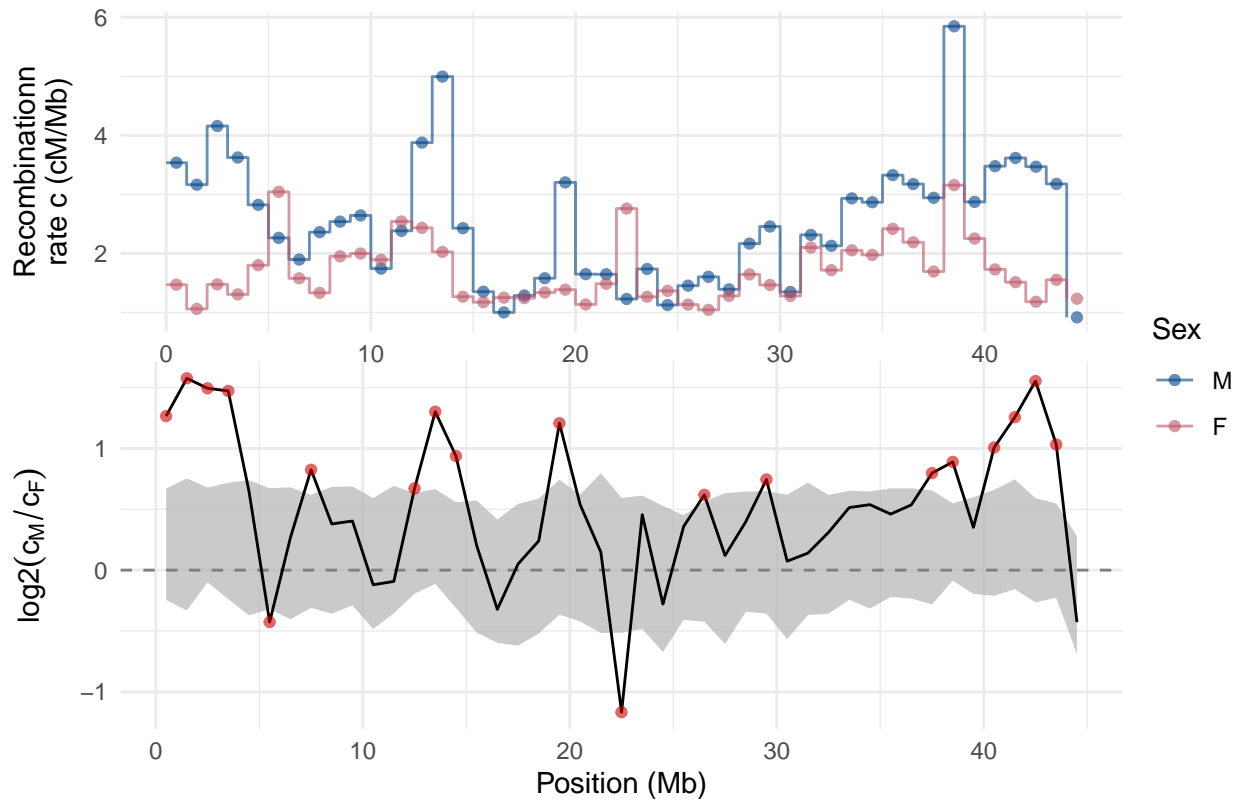

Recombination map on chromosome 29

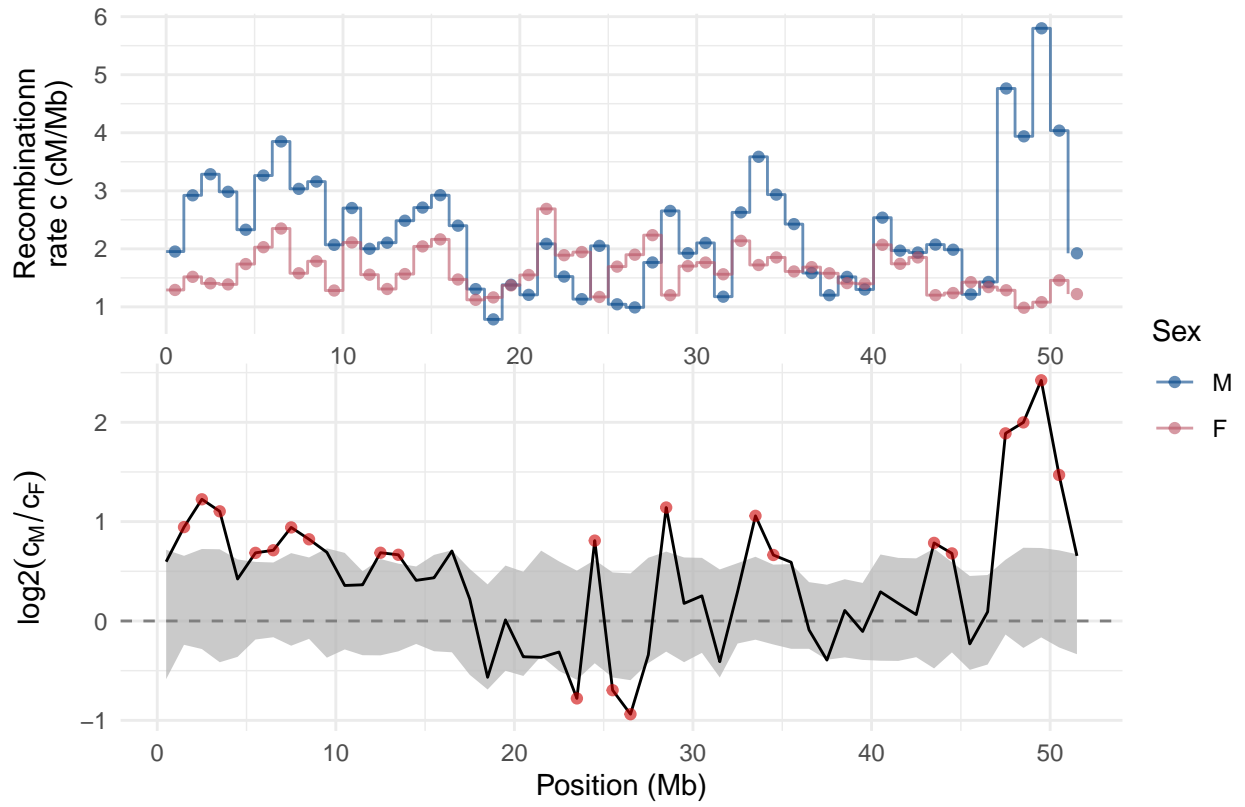

Supplement: MOESM5 [file 12711_2025_1001_MOESM5_ESM.pdf]
